# Supplementary material for: Front-of-package nutrition labelling policies in Uruguay, Mexico and Argentina
Source: Research Square preprint supplement (doi:10.21203/rs.3.rs-6691348/v1), 2025-07-15
Supplement: Supplementary file 1 [file 664d12780430393168159979.docx]

**Supplementary Materials**

**Supplementary Material 1**

**Key stakeholder interview questionnaire**

Please can you confirm your name, organization, position in the organization and role in the process of discussion and approval of the front-of-package nutrition labelling (FoPNL) in your country?

**GOVERNMENT**

1. What was the context of the beginning of the FoPNL discussions in your country?
2. During the process, which models were proposed and which one was approved?
3. What was industry interference like during the FoPNL policy approval process in your country? In which moments did the industry act? What were the main actors and the main corporate political activities used (arguments and practices)? How did the government deal with the industry interference in the process?
4. During the process, was there any kind of joint work or close relationship with other Latin American countries? How did that happen and for what purpose?
5. How was the human rights approach, especially related to children, considered during the discussions and for the approval of the FoPNL in your country?
6. What were the main challenges, difficulties and threats throughout the process?
7. What were the main lessons learned throughout the process?
8. What are the next steps to ensure the maintenance and effectiveness of the policy? Are evaluations of the policy implementation process being planned or conducted? How will it be or how is it being done?

**INTERNATIONAL ORGANIZATIONS**

1. What was the context of the beginning of the FoPNL discussions in your country?
2. How did the international organizations act to advance the non-communicable diseases (NCD) policy in your country/in the country in question? In which moments and with what activities?
3. What was industry interference like during the FoPNL policy approval process in your country/in the country in question? In which moments did the industry act? What were the main actors and the main corporate political activities used (arguments and practices)? How did your organization react or counter-argue?
4. During the process, was there any kind of joint work or close relationship with other Latin American countries? How did that happen and for what purpose?
5. How was the human rights approach, especially related to children, considered during the discussions and for the approval of the FoPNL in your country?
6. What were the main challenges, difficulties and threats throughout the process?
7. What were the main lessons learned throughout the process?
8. What are the next steps to ensure the maintenance and effectiveness of the policy? Are you aware of any evaluations of the policy implementation process, or if not, are you considering it?
9. What would you say are the key points/characteristics of your country/the country in question that can differentiate the process from others that have taken place in the region?

**CIVIL SOCIETY**

1. What was the context of the beginning of the FoPNL discussions in your country?
2. During the process, which models were proposed and which one was approved?
3. What was the role of civil society without conflicts of interest in the approval process of the FoPNL policy in your country? Which organizations played a key role?
4. What was industry interference like during the FoPNL policy approval process in your country? In which moments did the industry act? What were the main actors and the main corporate political activities used (arguments and practices)? How did civil society fight back?
5. During the process, was there any kind of joint work or close relationship with other Latin American countries? How did that happen and for what purpose?
6. How was the human rights approach, especially related to children, considered during the discussions and for the approval of the FoPNL in your country?
7. What were the main challenges, difficulties and threats throughout the process?
8. What were the main lessons learned throughout the process?
9. What are the next steps to ensure the maintenance and effectiveness of the policy? Are you aware of any evaluations of the policy implementation process, or if not, are you considering it?
10. What would you say are the key points/characteristics of your country that can differentiate the process from others that have taken place in the region?

**ACADEMIA**

1. What was the context of the beginning of the FoPNL discussions in your country?
2. What was the role of academia without conflicts of interest in the process of approving the FoPNL policy in your country? Which organizations played a key role?
3. What was industry interference like during the FoPNL policy approval process in your country? In which moments did the industry act? What were the main actors and the main corporate political activities used (arguments and practices)? How did academia without conflicts of interest strike back?
4. During the process, was there any kind of joint work or close relationship with other Latin American countries? How did that happen and for what purpose?
5. What were the main challenges, difficulties and threats throughout the process?
6. What were the main lessons learned throughout the process?
7. What are the next steps to ensure the maintenance and effectiveness of the policy? Are you aware of any evaluations of the policy implementation process, or if not, are you considering it?

**Supplementary Material 2.** Quotes from interviewees on the stages of FoPNL policy cycle by country.

| **Code** | **Country** | **Stage** | **Interviewee** | **Speech excerpts** |
| --- | --- | --- | --- | --- |
| URU1 | Uruguay | Context/agenda setting | International organization | *"And there it became very clear the effect that ultra-processed products have on the issue of obesity. At that time, in 2013, a study had been done which had shown that from 2009 to 2013, in Uruguay, the consumption of ultra-processed products had doubled. And in parallel... I am not talking about cause and effect, but I am talking about trends. In parallel, obesity in children and adolescents had increased dramatically".* |
| URU2 | Uruguay | Context/agenda setting | Government | *"We were working hard on training and on the dissemination of the Dietary Guidelines, and precisely the Dietary Guidelines has already introduced the issue of avoiding the consumption of ultra-processed products with excess fat, sugar and sodium on a daily basis. But we did not have a way to identify them, so it was good to somehow follow the strategies that we already knew were recommended by experts and international organizations. (...) But still, the identification of industrialized products was very difficult without a practical, quick-viewing tool that the consumer can use to select products. So, well, this was the context to put on the public agenda the fight to somehow stop the advance of overweight, obesity and non-communicable diseases. It was a priority within what are the policies of the Ministry of Health, but also of the country".* |
| URU3 | Uruguay | Policy discussion/ formulation | Academia | *"And as part of the initial discussion, in addition to doing like a literature review, what was done was to say, ‘well, what's the national evidence we have so far?’. So, if there were a few articles published, then it also gave more solvency or reliability to the information generated. So, that was part of the initial discussion, i.e., ‘well, perfect, the national evidence says or shows that the warning system seems to have an advantage over the traffic-light system’. So, in a way, the discussion let's say when it started in that group, after presenting that evidence, was like, ‘well, it seems like we have to go that way’".* |
| URU4 | Uruguay | Policy implementation | Government | *"And that is when the Ministry of Industry, when the first draft of the project comes out, is that it makes a public consultation for 60 days through its website, and in parallel, the Ministry of Foreign Affairs convenes an international commission on technical barriers to trade. These two processes generated, well, more than 140 comments from citizens, international organizations, academics and, well, and in this process these two spaces were maintained, permanent meetings with the industry. So, in that process there were changes, the initial position. For me, from the technical point of view, it was much more rigorous, but well, we had to negotiate some things politically and, as I was saying, we arrived at the system of front-of-package food labelling in more than 15 studies carried out by the Interdisciplinary Nucleus "Food and Well-Being" of the University of the Republic...".* |
| URU5 | Uruguay | Policy implementation | International organization | *"By March 1st the Decree was to be put into effect, March 1 was a change of government, which indicates how little conviction the previous government had to put this into effect, because they threw it to the next government. And I really learned what the industry lobby is, and how the politicians with that lobby are throwing the problems for later. (...) There was how to throw the ball forward, put it in the box and not make decisions. It was a year and a half inside the drawer of the secretariat of the President of the Republic".* |
| URU6 | Uruguay | Policy implementation | Government | *"The Decree granted companies an 18-month adaptation period. We understood that it was sufficient and the entry into force was scheduled for 03/01/2020. Then, when that date arrived, an extension was made through the Decree 246 of 2020, it was repealed until February 2021. There was a Decree there in the middle, which was the 034, which also, that is to say, in which some things were also left, that the health of Uruguayans seemed to be relegated in the face of economic interests and pressure from the industry".* |
| URU7 | Uruguay | Policy implementation | Civil society | *"Even the first Decree, even though it had a bit of interference from the industry, the consultations had been sent to the World Trade Organization, there was a public consultation, the public consultation was opened. It went through a process, which ended with the definition of the first Decree. These last two, which actually the last one, nothing, and furthermore there is no justification even for the limits. (...) And even when we in civil society said "well, but they are making the changes without justification, at the request of the industry", nobody from the government could tell you... (...) In reality, they were seeing and adjusting according to which products were or were not left".* |
| URU8 | Uruguay | Policy implementation | Civil society | *"We consider that in this battle that we fought, we won the one that left the octagon, that was black, that chose excess and that did not touch the critical nutrients that had already been defined, which are sodium, sugars, total fats and saturated fats. We achieved that. The battle we lost, maybe halfway through, but I consider we lost it a little bit, was the battle of the thresholds".* |
| URU9 | Uruguay | Policy evaluation | Academia | *"I believe that strengthening surveillance and evaluation are fundamental steps, as well as having public data on the surveillances that are carried out. I think that's necessary for the policy to work".* |
| URU10 | Uruguay | Policy evaluation | International organization | *"We are currently working on the definition of the processes for the registration and control of these foods, which will allow us to have a single national database for the monitoring and control of front-of-package labelling, with the commitment of all the municipalities”.* |
| MEX1 | Mexico | Context/agenda setting | Academia | *"They [the government] implemented the GDA, they did it without consulting any of these groups that we had been working with for years before, and then the industry managed in collusion with the Mexican regulatory agency, to implement it".* |
| MEX2 | Mexico | Context/agenda setting | International organization | *"It was a new federal administration, from the party opposing the previous administration, which had, therefore, an agenda of transformation, of change, and which had at the head of the undersecretariat of prevention and health promotion a person prepared and trained at the National Institute of Public Health, that is, with a public health and evidence-based approach".* |
| MEX3 | Mexico | Context/agenda setting | Government | *"It is one of the many priority issues that, when this government started, in its agenda was the updating of several regulations that exist here in the country, and one of those was labelling, so as part of public policy, it was among the priority issues".* |
| MEX4 | Mexico | Context/agenda setting | Civil society | *"We were fortunate that the official Mexican Standards establish a review every five years. Then, with the entry of the new government, the new government's intention to modify the front-of-package warning labelling coincided with the five years in which the official Mexican Standard had to be revised".* |
| MEX5 | Mexico | Context/agenda setting | Civil society | *"And, well, there was a context where the National Institute of Public Health with a very clear academic work and the construction of a large front of specialists and researchers supporting the proposal of the Chilean model of warning labelling. And well, also a network of organizations, the Alliance for Healthy Eating, also pushing towards this, and also at a very important context level, the full support of the Pan American Health Organization and the support also mainly from UNICEF”.* |
| MEX6 | Mexico | Policy evaluation | Academia | *"Well, we have a permanent program right now to evaluate the labelling. We have seen its impact on product prices, we have seen its impact on decision-making in children, adolescents and adults, we have seen the perception of its usefulness, we have seen its impact on special groups such as indigenous people, the elderly and women. And the results are very, very good, so, well, we have to continue with that".* |
| ARG1 | Argentina | Context/agenda setting | International organization | *"...at that time the PAHO's Action Plan for the Prevention of Childhood Obesity was beginning, and there it clearly talked about the regulation of environments and it talked about warning labelling as one of the recommended policies to prevent childhood obesity, then there were some international recommendations that at that time began to exist in that sense”.* |
| ARG2 | Argentina | Context/agenda setting | Civil society | *"We had been working a lot on what was the food environment, the obesogenic environment and different policies to monitor what that environment was in terms of promoting different policies, and we had already been understanding front-of-package labelling as a gateway to think about other policies to regulate the food environment".* |
| ARG3 | Argentina | Context/agenda setting | International organization | *"...because he had a supportive Minister, a Minister who, moreover, allocated resources and who had front-of-package labelling as the main item on his agenda. (...) Labelling was already on the agenda, there were bills because social organizations and some legislators had started it when the discussion began in Chile".* |
| ARG4 | Argentina | Policy discussion/ formulation | International organization | *"...because the economic arguments of the permanent economic crisis in Argentina always stated that it was not the right time to move forward with a policy like this that was going to generate economic damage to companies, damage to exports then, the challenges of the industry interference taking advantage of the country's economic crises were always there".* |
| ARG5 | Argentina | Policy discussion/ formulation | International organization | *“’It is an issue for the rich, for the middle class that will not solve hunger or poverty, people do not eat, this is useless because it will not solve the real problem, which is hunger’. That was the initial discussion, as if we were putting on the agenda a banal discussion, irrelevant to food at one point, attending to a reality that there is a lot of hunger and poverty and that it is true that labelling alone does not solve the issue, but already used by the industry to shift the focus and to avoid the discussion".* |
| ARG6 | Argentina | Policy discussion/ formulation | Government | *"...it was to start promoting, generating local evidence, because there was a lot of international evidence, but there was no local evidence regarding what was best for us as a country in terms of the graphic system and so on".* |
| ARG7 | Argentina | Policy discussion/ formulation | International organization | *"We, in that way, put out, between 2018 and 2019, a front-of-package labelling standards document with conflict of interests statement, where the majority of the panel members supported the front-of-package warning labelling because of all the evidence and the PAHO [nutrient] profile. Only those who objected were those who had, who received funding from or were directly related to the food industry. So that published and disseminated Standard was a critical input for legislators to say, ‘well, this is the norm, this is the Standard that the Ministry of Health is recommending’. That was a key role".* |
| ARG8 | Argentina | Policy discussion/ formulation | Government | *"Projects were also being generated in the Legislative and what we did with those projects in the Legislative was to advise them, we advised on all the projects that were, that passed through the Legislative, including the one that was approved".* |
| ARG9 | Argentina | Policy discussion/ formulation | Government | *"...in my particular case, that is to say, I myself went through a process since I presented a project at the beginning with fewer tools and less knowledge than later as we worked on it, and it was useful for me that we had a lot of meetings, let's say also on my own initiative with civil society organizations to get more involved in the issue and also to have more technical arguments and start to know where the system was and where it finally advanced”.* |
| ARG10 | Argentina | Policy discussion/ formulation | International organization | *"Something wonderful that happened in Argentina is that legislators from different political parties and even opponents, political enemies, were able to reach consensus on a unified front-of-package warning labelling project with the PAHO [nutrient] profile, with the broad marketing restriction and with a school environment policy that crossed the entire political arc. So, there were 12 or 13 projects that they unified under one".* |
| ARG11 | Argentina | Policy discussion/ formulation | Government | *"It was a very important role within my block, leading the discussion of the synthesis project that arrived at the Chamber of Deputies from the Senate, because the discussion began, the first half sanction was in the Senate of the nation and in the Chamber of Deputies and then it was finally approved".* |
| ARG12 | Argentina | Policy adoption | International organization | *"The day they voted on the law, they were experts, labelling experts, industry interference experts. So, this was a very clear indicator of how over the years, from all sectors, the Ministry of Health, civil society, PAHO, UNICEF, legislators, provincial ministries, provincial governments, everyone was trained in nutrition societies. So, legislators came to the vote on the bill with a level of knowledge that we were crying in the stages of the Congress because we were saying, ‘we can't believe legislators are saying that’”.* |
| ARG13 | Argentina | Policy implementation | International organization | *"The people at the Ministry who are bombarded by requests for industry claims for extensions, to stretch the implementation of the law. And that it is giving an internal struggle, the committed people of the Ministry, an internal struggle to put in place the mechanisms of control…”.* |
| ARG14 | Argentina | Policy implementation | Civil society | *"So, in those provinces that make the gesture of adhering to the national law, mentioning to them these issues where they can make a difference is something we are finding ourselves doing, not only at the provincial level. Many times, we are also called by cities, municipalities. And well, we are doing that, we continue raising awareness, we continue training, we continue marking in some way the north by which to bring documents on how to do it (...) In some way it is also to strengthen civil society, it is that, it is like strengthening mechanisms at subnational level so that the law can be implemented throughout the territory".* |
| ARG15 | Argentina | Policy implementation | Government | *"So that is very important, to ensure the issuance of complementary regulations for implementation. And to form work teams to ensure this implementation. We have this, technical tables with different agencies, which ensure different implementation issues, from the development of courses to train teachers to incorporate food education, the modification of the specifications, training to PyMES so they can implement labelling on their packaging".* |

**Supplementary Material 3.** Quotes from interviewees on the themes that emerged from the desk review and interviews by country.

| **Code** | **Country** | **Topics** | **Interviewee** | **Speech excerpts** |
| --- | --- | --- | --- | --- |
| URU11 | Uruguay | Type of regulatory instrument | Government | *"So, well, the Decree was chosen for its feasibility, for its speed, and in the end, it ended up being a path that was not so fast. But well, that was a decision that was made with the information they had at the time".* |
| URU12 | Uruguay | Type of regulatory instrument | Academia | *"It is the way food regulations are made in Uruguay, that is, all food regulations in Uruguay are made through decrees. So, it was like the natural way to do it, because in fact all of it, the food regulation, this is the bromatological Decree, the bromatological regulation is a decree and it is modified with the subsequent one. They are decrees that are issued on that decree that modify it. So, all food regulations are decrees”.* |
| URU13 | Uruguay | Type of regulatory instrument | Government | *"And that is why today we are working on a law on healthy food environments that goes beyond... It includes front-of-package labelling so that it remains in support of a law, so that it does not have the fragility that has a decree that is changed by another, as happened to us, which continued to maintain a public policy, but perhaps with weaknesses in the control or with weaknesses in the parameters that had already been made more flexible”.* |
| URU14 | Uruguay | Role of stakeholders | Government | *"So, we were the ones who made the calls and we were the ones who, from the Ministry of Health, gave a great impulse to the policy. We saw how the coordination of this inter-institutional group, we developed the documents, of course it was a collective construction and then they were always put in coordination with others. But yes, the Ministry of Health played a slightly more leading role in relation to the other institutions that supported and accompanied a lot, and without that participation, it surely would not have been possible to reach the Decree".* |
| URU15 | Uruguay | Role of stakeholders | Academia | *"The Ministry of Industry took on a, shall we say, governmental role, in the sense that it participated in the discussions, gave its opinion and so on, but what was also interesting was that it was a very active advocate of the policy in reality, that is, both the Ministry of Health and the Ministry of Industry worked. While the leadership was the Ministry of Health, the Ministry of Industry was co-leader, let's say, I mean, and never had major objections".* |
| URU16 | Uruguay | Role of stakeholders | Academia | *"The fundamental role that the academia played, beyond being able to give opinions and make suggestions and be part of the discussion and design process, had to do with the generation of scientific evidence to support decision making. This is a very interesting feature of the process in the sense that every discussion about the type of system to implement, then the design, the typeface, the size, the colour, all these discussions were not taken arbitrarily, but in many cases specific studies were designed to answer those questions and those studies were executed, let's say, in reduced times to allow decisions to move forward in the design process".* |
| URU17 | Uruguay | Role of stakeholders | Government | *"We had a great deal of support from the University of the Republic, which provided fundamental support to be able to move forward on these issues. Because, well, really that, they generated evidence at a local level to be able to demonstrate that this model was the best and the one that jumped better in our population, the one that had more advantages in relation to the other models, they made several studies (...) Around 15, if not more studies that supported absolutely each of the decisions that were taken, from the shape of the label, the colours, the words that they understood, and each of these things was evaluated for decision making with Uruguayan population".* |
| URU18 | Uruguay | Role of stakeholders | Civil society | *"This allowed us to go out and discuss and confront situations and to give each other arguments as to why or why not things should be done. So, I think that is where the work lies, but not only in Uruguay, I think that in general, to be able to work with an academia that does not have conflicts of interest...".* |
| URU19 | Uruguay | Industry interference | Academia | *"So, the industry, let's say, started to act or move on the issue when the public consultation started, that is, actually, when the first proposal was put out for public consultation. That's when the industry's actions began. The actions they took were to go out to the press, that is, to use, like all these arguments, that is, to divert attention, that is, to generate, to divide, that is, to propose another system, that is, that the system has not worked, to say that the policy was not going to work, that education and these types of measures were needed, as if to generate this idea that sales would be affected, that labour sources would be lost, that this policy violated MERCOSUR. All the difficulties that were going to be generated, that is, to divert attention from the public health problem, that is, to generate these ideas of new alternatives or new policies or new systems. That's all it is as the media, that is, going out to the media to propose all these things".* |
| URU20 | Uruguay | Industry interference | International organization | *"In that public consultation we were sent the same arguments by all the countries, the industry of all the countries, why labelling cannot be done. They were in contact with each other and they were all saying the same arguments and repeating the same argument. Coca Cola sent the President of the Republic a letter saying it was going to pull out of investments in Uruguay if we put the label on it”.* |
| URU21 | Uruguay | Industry interference | Government | *"During the process in which we were working on the design of the regulation (...) there was a lot of direct interference from the industry, but mostly not directly on the group. (...) Their opinion was considered through public consultation. The aspects that had a technical basis, having a reason to be, were modified. But yes, a lot of interference behind the wall. Multiple notes from the industry talking about how jobs were going to be lost, that the industry was going to go bankrupt because they were going to stop selling and that all products were going to have an octagon. So, labelling wasn't going to be tactful."* |
| URU22 | Uruguay | Industry interference | Government | *"And also, through academics linked to food production. For example, we had an experience in which there were certain academics who made the rounds of multiple media and later we found out that, in reality, they were brought in by a communications consultant who was paid by a supermarket chain. So, the interference was not only direct, let's say, through the industry spokesperson, but also by academics and scientific societies...".* |
| URU23 | Uruguay | Industry interference | International organization | *"One of the most important options was that we could not do this labelling because the other MERCOSUR members did not have it and that with that, then, we were not respecting MERCOSUR, the MERCOSUR norms".* |
| URU24 | Uruguay | Industry interference | International organization | *"And MERCOSUR was discussing front-of-package labelling in its specialized groups on health and food and the industry operated at a certain moment, in that 2015-2020 period, relying on some legislators from Paraguay to question at the MERCOSUR level. (...) Although they were in their agreements of the MERCOSUR health ministers there was an operation through legislators where from Paraguay parliamentary discussion areas were generated in the PARLASUR [MERCOSUR Parliament]".* |
| URU25 | Uruguay | Industry interference | Civil society | *“The industry was always interfering or lobbying throughout the process. Even the initial deadline, when defining the 2018 Decree that was left to be implemented in 2020, that deadline is interfered with by the food industry. (...) And with months of difference when that new [Decree] came out and the industry realized that in some aspects it did not favour it, they made a modification again in a matter of months and under the same government".* |
| URU26 | Uruguay | Industry interference | International organization | *"Within the companies there was fragmentation. There were also companies that adhered to the measure prior to March 2020, which generated a, I would say, a certain inequity between those that were waiting to see how effective their lobby with the new authorities was going to be and how much they were going to achieve, how deep the crack they were building was going to be, and others that adhered to the proposal and actually placed the labels on all their products. That generated inequality".* |
| URU27 | Uruguay | Response to industry interference | Academia | *"When all that information came out it's like the government made an effort to say ‘no, we are going to stick with the policy that is already in place’, that is, and in fact a few days after all that came out to the press, a press conference where they said "we are going to continue with the labelling." So, that I think is important even though the industry was probably doing its interference activities at the same time, but the fact that the policy was well evaluated, that it was working and so on, forced, I think, to keep the policy".* |
| URU28 | Uruguay | Response to industry interference | Academia | *"I remember a note that was called 'A Nourishing Debate Between Octagons and Traffic Lights', something like that, there was the industry perspective and the academia perspective. That is, there was always, there was always that space (...) There were also, from the media, notes or spaces for the sectors of academia without conflict of interest to give their opinion and say "no, I do not agree", and even answer almost what point to point what they had said before. So, I think there was a role for sure in the media".* |
| URU29 | Uruguay | Response to industry interference | Academia | *"I believe that participating in inter-institutional spaces, developing alliances with international organizations to, for example, inform or decide which were the best arguments to handle in certain spaces. Or to have a fluid link with the civil society to also support in whatever is necessary. And also provide spaces, arguments and evidence for civil society actions".* |
| URU30 | Uruguay | Collaboration and support | Civil society | *"We coordinate a lot at the MERCOSUR level, because here in Uruguay the modification was left open to the fact that if MERCOSUR agrees on another nutrient profile, Uruguay has to adapt. So, we came out of civil society, we came out of that crossroads very strongly. In Uruguay, we were not allowed to participate in MERCOSUR meetings. Brazil was already participating and Argentina had recently joined. So, even that was useful for us in coordinating with Brazil and Argentina. It allowed us to know what the MERCOSUR meetings were about. So, that was preparing us to come and do advocacy in Uruguay, then we were allowed to enter very late”.* |
| URU31 | Uruguay | Collaboration and support | Academia | *"In Uruguay, it was quite important to move forward with the process and in a way to unblock this idea that MERCOSUR was being violated, was the declaration of MERCOSUR health ministers, where this was also promoted in a certain way by Uruguay, which gave it a political endorsement to move forward alone, let's say, and not wait for the giants, that is, Argentina and Brazil, to move forward. So, there was also a process of work, of discussion at a more technical level to promote this declaration, to draft this discussion, this declaration and that this declaration was finally made and that this would speed up, let's say, the signing of the Decree".* |
| URU32 | Uruguay | Collaboration and support | Civil society | *"...we coordinated with the region, and also we, just as we wanted and want Uruguay to make more progress, to improve, we also want the whole region to have the labelling, because of course, when there are two or three of them, they can leave you isolated. Now, if there are many of us, it is different. Beyond the fact that one profile or another, whatever, but if we all start to match the octagon, the ‘excess’ or the ‘high’, well, then you have to see how it changes, I mean, it gives you another strength and it is not as easy to modify it as when you are alone fighting it".* |
| URU33 | Uruguay | Human and children's rights | Government | *"Well, the issue of children's rights and the situation of the nutritional status of children and adolescents has always been a central issue. Whether from the right to quality food and full development of their growth potential, as well as when it comes to families being able to make informed decisions to provide quality food to their children. So, the issue of the right to food, adequate and healthy food was always considered".* |
| URU34 | Uruguay | Human and children's rights | Government | *"For us, it [human rights] is an axis that runs through everything. It was a conceptual basis under the concept of the human right, as I was telling you, food, that is, the right to food is a fundamental human right that is exercised when people have physical and economic access at all times, sufficient or adequate food, and it is the State, this I want to claim how well it is the one that must develop policies that guarantee this full exercise of the right to food for all citizens".* |
| URU35 | Uruguay | Challenges, difficulties and threats | Government | *"So, well, this joint work, really intersectoral and interdisciplinary, with a purely health objective, was a great challenge, at the level of work. And I think it is very good at the time and good, and that luckily, we had the support of all the people who came from other institutions, with other professions and with other views on the subject, but who nevertheless were working together to achieve that common goal of improving health".* |
| URU36 | Uruguay | Challenges, difficulties and threats | Academia | *"I think one of the initial difficulties was like the lack of scientific evidence at this point in time on the subject, where there was no scientific paper in a respected journal, talking about warnings. That was, let's say, a difficulty that had to be overcome, that is, generating evidence in the country. Later, Chile published some of his articles, but in fact, at the time Uruguay started working, there were none".* |
| URU37 | Uruguay | Challenges, difficulties and threats | Civil society | *"The weakness we have is conflicts of interest in civil society itself. Because there is a lot of linkage with the industry, because there is funding from the industry of activities or associations that provide their certificate to the industry and base their activities on that. That is a great weakness, because even that weakness has led us to be divided in the discussion of the project that is in Parliament, which even goes against scientific evidence, that is, it does not support scientific evidence, but interests are interests".* |
| URU38 | Uruguay | Challenges, difficulties and threats | Civil society | *"What the academia mainly assesses is that it was the dairy products aimed at children that were hurt the most. That was the one thing that was really affected and needs to be corrected as soon as possible. (...) So, there were products that lost excesses and there were a few that gained some excess. But, in general, what they did were changes, without justifications, without being based on scientific evidence, without being based on international recommendations and facts. We could, at least from civil society, what we evaluate is that it was a weakening of the policy itself. That's about as far as we can tell in terms of strictly the changes".* |
| URU39 | Uruguay | Challenges, difficulties and threats | Academia | *"So, those changes basically, obviously, have nothing to do with the technical, but were decisions that we don't know how they were made in that political process, where it was a discussion at a much higher level than the technical representatives of the ministries or of the different institutions. The big mistake was that, when this Decree was signed, it was stated that the implementation would come into effect on the same day of the change of government, March 1st, 2020. Then, of course, when the government changed, this introduced noise in the whole implementation process. (...) So, of course, when the government changed, the fact that the whole process was handled at the level of the Executive power, and an Executive power led exclusively by one political party meant that, in a certain way, the other parties were not involved. The other political parties did not participate in the discussion nor were they sensitized".* |
| URU40 | Uruguay | Challenges, difficulties and threats | Academia | *"The threat of the change of government, that is, the lack of problematization or discussion in the political system about the need to regulate environments, and the low prioritization of the issue at the political level and, above all, as the lack of systemic vision of food. So, a lot of times this type, so, for healthy eating is educating, and not much more than that. But, in reality, it goes much further, and that I think is a great difficulty and a great threat in the sense that there is no understanding of what the implications are and what the importance of moving forward with this type of policy is".* |
| URU41 | Uruguay | Strengths and lessons learned | Government | *"Because we had to, somehow, coordinate and join efforts to reach the same goal with institutions and referents coming from different sectors. We, for example, were fortunate that at that time the Ministry of Industry supported this process [the time of the design of the draft Decree]".* |
| URU42 | Uruguay | Strengths and lessons learned | International organization | *"First of all, when you start this process, you have to have a lot of scientific support. It is necessary to do top-level work, because if it was difficult with them, it would have been impossible without them. So, investing in evidence, first point that is fundamental: investigate, investigate, investigate. To be clear about each of the flanks there were, to investigate them and to be able to have evidence”.* |
| URU43 | Uruguay | Strengths and lessons learned | Civil society | *"So, I think it settled in a lot. And we reinforce that discussion in society about what we are eating and there is a strength today that in society there is a questioning of what we are eating (...) I believe that one strength is of civil society to take action, and the public visibility that we acquire. We have become a reference on the subject, even the press nowadays, if something happens with labelling, we are summoned. The discussion on the problematization in society of what we are eating".* |
| URU44 | Uruguay | Strengths and lessons learned | International organization | *"Therefore, here I believe that very strong marketing techniques are needed to counteract the effect of the industry, it is still difficult to counteract it, but there must be excellent communication teams that, based on the evidence, take the evidence and transform it into clear messages to the population that somehow counteract the marketing done by the industry".* |
| URU45 | Uruguay | Strengths and lessons learned | International organization | *"The industry never rests, we already knew that, but to see it again and again is very important. The alliance has to be very broad. I believe that alliance policies must reach the territorial organizations in order to be more effective. In other words, it is necessary to broaden the alliance by reaching the capillarity of the territory, making micro alliances in the territory, local health plans that take those health objectives and that public policy to the concreteness of the territory, here and now in this community".* |
| URU46 | Uruguay | Strengths and lessons learned | Academia | *"A big learning was the importance of the discussion of issues in the political system, the need for these issues to be discussed in the entire political system. And even if there is leadership from a certain actor, it is important to empower the entire political system so that this becomes State policy and not just a party policy. (...) Uruguay opted to move forward through a decree. But that implied a lack of discussion in the political system and that had a very important implication for the continuity of the policy and all the changes that were seen later had in part to do with that lack of political discussion and political empowerment on the issue".* |
| URU47 | Uruguay | Next steps | Government | *"Today, we have here in the Uruguayan Parliament a bill that will be a priority this year in the Commission on Population and Development, which is a public policy where front-of-package food labelling is the basis for a policy associated with healthy food environments. (... ) And then, from there, we built a bill with the concept of healthy food environments, as the physical, economic, political and socio-cultural context, where food is obtained that there includes certain axes, linked to education, strengthens a law that already exists in our country and what we try to do is to take a fundamental step towards this being the construction of a public and State policy, the framework of a law that contributes to the right to food in the Uruguayan population through the promotion of food environments that protect health and promote eating habits".* |
| MEX7 | Mexico | Type of regulatory instrument | Civil society | *"On the part of the Ministry of Health they wanted to make a law, a specific labelling and advertising law, like Chile. That was one proposal. Another proposal by other organizations, such as The Power of the Consumer [El Poder del Consumidor – Mexican NGO], was that they only wanted to focus on the Standard, on 051. And another proposal by another civil society organization was that, although Standard 051 was important, it was necessary to make a modification at the law level".* |
| MEX8 | Mexico | Type of regulatory instrument | Civil society | *"We have an opportunity every five years to make it into the Standard and those who get into the Standard are more technical people. In the law, the only ones who have a say are the legislators, not all of whom are specialists in the subject. So, it was to achieve a balance so that it would be general, as the laws should be, to put the minimum necessary to guide the Standard, but also as you said before, from Article 212 it already said that this was going to be in a standard, because that is what the industry did, the industry went to the Standard and in the Standard they put the GDA".* |
| MEX9 | Mexico | Role of stakeholders | Government | *"All the research, all the scientific evidence there was by the National Institute of Public Health. They were like our lawyers to be defending the key points".* |
| MEX10 | Mexico | Role of stakeholders | Academia | *"Well, I believe that the role was one of support and it was a very, very, very fortunate strategy, because when the Institute [INSP] was appointed coordinator of the national group of experts on labelling, what we did was to carry out an internal review of Chilean labelling and other alternatives. We developed a preliminary proposal and then we started to show it to key people from other institutes, people who are experts in nutrition in different components (...) It was a very strong tool because we said "here is a review article where more than 80 national experts from more than 20 universities and more than 30 national institutes, all of them members of the national system of researchers, some members of academia. (...) All of them agreed that what the country needs is a warning label with the following characteristics”. So, there was no longer anyone with a conflict of interest, who said "no, no, I don't agree", no one dared to disagree with that project".* |
| MEX11 | Mexico | Role of stakeholders | Civil society | *"It was a very important role because they had no conflict of interest and also had a track record in the field. This served both in the legislative process as well as to legitimize and, in addition, to publicly pressure these actors that the legislators, who perhaps do not have much knowledge, but their political cost is very high, then even those who were against it in closed discussions, in open discussions at the time of voting, always voted in favour because how could they vote against something that was in favour of the public interest, of health and of the children? And in the working groups, well, also because, well, they are prepared NGO that can discuss perfectly well with people from the industry about these issues".* |
| MEX12 | Mexico | Role of stakeholders | Civil society | *"First, this slight change in the General Health Law. We campaigned very hard, we really lobbied hard in the Congress. There was a massive campaign, a campaign that even incorporated people, artists, actors, actresses with a lot of presence. So, we generated all this public opinion in favour of the labelling. During the process of the months of the working group for the Standard, there is an agreement there, there is a principle where one cannot sign a confidentiality declaration, where one cannot publicly expose what is being discussed there. So, that was the work inside, much in support of the academia, because there were discussions of many hours, many meetings. There were four- or five-hour sessions and there were more than 12 sessions. I don't remember right now the exact number, but well, the confrontations within the sessions were very strong confrontations with the industry".* |
| MEX13 | Mexico | Role of stakeholders | Government | *"One thing that worked a lot was also that they [the industry] couldn't go public or social media or news or whatever the information was. That was also a good thing, because otherwise they would have had more resources to say why it wasn't good. Well, because they have more resources to be able to carry out campaigns, so it was good that the working tables were behind closed doors, it is very important that they are not so open so as not to have these campaigns of throwing each other around. That the work was internal".* |
| MEX14 | Mexico | Industry interference | Civil society | *"Then everything was working that way and the industry saw that there [in the working groups] it could not. At that time, the industry's great ally in the Executive branch was the head of the office of the Presidency. Yes, a man named Alfonso Romo is no longer in that position. That during all the years of the current President López Obrador's struggle, he was an ally of the industry. And then the industry even had situations where we had a working group meeting and the meeting was cancelled. And representatives of the Ministry of Health, the Ministry of Economy and the National Institute of Public Health were summoned to the office of the Presidency. And then it was at least twice, I remember. And who were there was the head of the office of the Presidency, along with the heads of Mexico's major business associations, the most important ones. They did not participate in the working group, they were the bosses. And then they started to generate all the pressure against them, but well, this group returned to the working group and did not allow themselves to be pressured. And they also tried to influence the President, but the President said, 'there's the task force, I'm not going to get involved'".* |
| MEX15 | Mexico | Industry interference | International organization | *"At these roundtables I would highlight this tactic that industry uses, which is to divert attention by, for example, arguing issues that really weren't the problem, or even misinterpreting the science. They mentioned or brought up some papers, but manipulated the conclusions of those papers in their favour. I think that would be something that was reiterative”.* |
| MEX16 | Mexico | Industry interference | Government | *"The truth is that it was always against, there was never a time when they said they agreed, there was always, if it wasn't the food industry, it was the beverage industry, not that they always disagreed in some situation. For example, we had already reached agreement on the labels, after so much discussion, so much evidence. The sweetener issue was a very complicated one, because obviously they were opposed to having that legend. They defended it tooth and nail that it was not put on".* |
| MEX17 | Mexico | Industry interference | Civil society | *"I mean, it doesn't end. That is, since the appeals began, that is, more than 140 appeals. So, most of their appeals are rejected, but they find some judge who gives them the reason. So, right now we have, I believe, around eight appeals in the Supreme Court of Justice. There are already draft rulings for three appeals that go against the industry's appeals, but there are still five more to go...".* |
| MEX18 | Mexico | Industry interference | International organization | *"Then, I remember very well that they filed an appeal after the working tables were finished. That was February 2020. Then, they filed an appeal claiming that the process was not adequate, that it was even unconstitutional, something like that. I mean, I think this tactic was reiterative, but it was also kind of exhausting… February's was more exhausting, but they are tactics that, well, seek to undermine the policy itself and then also question some aspects of the policy such as nutritional profiles, the restriction of the characters, which are strong and important elements of this policy".* |
| MEX19 | Mexico | Response to industry interference | Civil society | *"We use something that exists in the United States called Foreigner Legal Assistance, by which you can present a case before a judge in the United States to request information from a company, if you demonstrate that this information is important for a process that is taking place in your country. We succeeded in getting the judge to agree with us. Information was requested from Coca-Cola and we were able to demonstrate through Coca-Cola's emails with COFEPRIS, which told us that there was no working group, because COFEPRIS and Coca-Cola were agreeing and Coca-Cola was advising for the type of labelling, when the labelling was designed".* |
| MEX20 | Mexico | Response to industry interference | Civil society | *"We exposed a lot, we made some appeals, those civil actions against this. The appeals reached the Supreme Court, the first instance, the first judge said that the GDA violated the right to information, the right to health and the right to children. The industry challenged and therefore went all the way to the Supreme Court. Much attention was generated about the Supreme Court. The Supreme Court finalized the first draft of the judgment. They [the Supreme Court] agreed with us, they said the same thing. But there was influence from some ministers linked to the industry, and they turned back the appeal. We lost it in the Supreme Court, but we won it in public opinion".* |
| MEX21 | Mexico | Response to industry interference | Civil society | *"On the Legislative branch side of the law, we talk a lot about industry exposure, industry interference, industry lobbying. Even some legislators denounced the heavy lobbying there was from the industry in the Congress".* |
| MEX22 | Mexico | Response to industry interference | Academia | *"Basically, we started generating a series of quick studies. When we realized that there was no evidence for anything, practically, instead of talking about perfect evidence, we started talking about making decisions based on the best available evidence. And then we changed that narrative. We started talking about available evidence and then, when there was no evidence for something, we could generate a study...".* |
| MEX23 | Mexico | Response to industry interference | Academia | *"And they started to promote the labels a lot. See, 'consume food, preferably without label and if not, with fewer labels'. A lot of movement to showcase companies that were not complying or did not want to comply was also started to see on social networks".* |
| MEX24 | Mexico | Collaboration and support | Civil society | *"So yes, in certain stages, both in the Law and in the Standard, there was both very specific support and also pressure support, that is, public positions, from these people and also samples. That is to say, when we were in the Law in the Senate, an evaluation came out of Chile on how the labelling had favoured, which was mainly in the reduction of consumption of sugary drinks, so that also helped us, as proof that, number one, the industry did not go bankrupt, but also that there were positive impacts on health".* |
| MEX25 | Mexico | Collaboration and support | Civil society | *"So yes, there was a lot, a lot of contact with people in the region. I believe that this phenomenon of front-of-package warning labels in Latin America is also the expression of a very close and long-standing relationship between academics, civil organizations, and even government technicians".* |
| MEX26 | Mexico | Human and children's rights | Civil society | *"Yes, always in all of this, especially when incorporating the sweetener issue, the caffeine issue and the character issue in packaging. Yes, there was a constant reference to children's rights. In this process, we have worked very closely with the network for children's rights in Mexico, which is a network of around 60 children's rights organizations. In this regard, UNICEF's participation was also very important".* |
| MEX27 | Mexico | Human and children's rights | International organization | *"...the fact that this labelling had been proven that children understood it unlike the other labelling systems. There, I believe that the Institute [INSP] carried out an experimental study with girls, boys, (...) and it also served to support this assertion".* |
| MEX28 | Mexico | Challenges, difficulties and threats | Academia | *"Every organization has its way of operating, has its leaders, has its egos and has its concerns and mistrusts. So, at the beginning it was very difficult. We, for example, in the academia, felt that we were very clear about why and how it should be, but suddenly in the government they said 'no, but we are the ones who have to say how it’s going to be done'. And then there were those from the NGO who said 'well, but no, we are the ones who are driving this'. So, at the beginning it was a little bit complex to have a common vision and to have that trust".* |
| MEX29 | Mexico | Challenges, difficulties and threats | Academia | *"Well, one of the main challenges was to sit at the table with equal voice and vote to come up with a standard that could benefit the population and that is where everybody came out thinking they won. In other words, where there really were agreements, where everyone left feeling comfortable. Where, for example, academia can protect the health of the population. And on the part of the industry, which was something we argued throughout the whole process, to achieve better quality products, because the idea was not just to affect the industry for the sake of affecting it, to demonize for the sake of demonizing, but rather it was an opportunity, and this was the great challenge, to have or to be able to develop better quality products. (...) It is really frustrating to think that there has to be a process like this for these changes to take place, when it’s something that should happen naturally. So, that I think was the first challenge, to sit down at the table and try to come to this agreement".* |
| MEX30 | Mexico | Challenges, difficulties and threats | Academia | *"And other threats, I believe, have been the appeals, because they are the legal departments of all the largest companies in the world, multinationals, against the small legal department of the Ministry of Health. And this is being discussed in the Supreme Court, that is, the decisions of the Supreme Court are almost final. (...) Very important things can be lost there, so right now in the Supreme Court we have all been going, all of us, from the Institute [INSP], from the government, from the Ministry of Health, from PAHO, from other countries. And it’s the same thing that we are there, all of us going, because we know that what is at stake is, well, a thing that if it’s lost would be a major setback for this policy".* |
| MEX31 | Mexico | Strengths and lessons learned | International organization | *"Another learning, it seems to me that, in Mexico, in particular, it was very fortunate to synchronize the work between the Legislative and the Executive powers, because it allowed the support from the Law and that gave it, therefore, even more strength or less probability that even in the Judiciary it would be possible to overturn the Standard 051, to revert it".* |
| MEX32 | Mexico | Strengths and lessons learned | Academia | *"So, I think one of the biggest lessons learned is that we have to learn a lot about how to approach and sit at the same table to discuss, because in many occasions the discussions were not so friendly. They were quite heated, and maybe that's what made the process so difficult, so I think we have to learn a lot to count on the communication, how to communicate with others and how to sell health messages and how to integrate these messages into a broad policy where it's not all focused on one point".* |
| MEX33 | Mexico | Strengths and lessons learned | Academia | *"But going to those tables and discussing against a very organized block of the industry, suddenly generated that link and then I think there came a time when one said, well, interviews, we had thousands, so at first you said, 'I want to take the interview', and then you said 'hopefully, someone from civil society can take it'. And you really liked it when they answered. And then the government saw that academia and civil society were technically very strong. Then they also started to 'hey, how do we do it? We have to defend this and they started calling us. How are we going to defend this? We, if they tell us this, what do we have to say?' And then we started to work very well. In other words, I think that was fabulous, it generated a common vision, trust, a relationship as the industry does".* |
| MEX34 | Mexico | Strengths and lessons learned | Government | *"And another thing is that it will also help us in Mexico to align the other norms or guidelines that we have regarding food. This will help us to balance everything, so that everything is on the same line. For example, we have guidelines here for the preparation and sale and distribution of food and beverages in schools, which we launched in 2014. It was in stages that were sold from 3,000 products to 300 in schools, but now, with the update that we are going to have of these guidelines, they will be attached to this labelling, to this Standard, a label to the Standard. That any product sold in schools should be without labels".* |
| MEX35 | Mexico | Next steps | Civil society | *"Well, this healthy environment in schools was one of the next steps, and the most important and challenging one, because this administration will be coming to an end. The first thing we want to do is to secure what is advanced. And then, perhaps, to advance a little more and in what has been advanced, it has been the issue of advertising directed to children and adolescents. Therefore, it is important for us to present a package of initiatives. For, in other words, the level of the Law for this, at least it should cover what is in the NOM, because now there are also appeals. Then, if the law changes, their appeals become moot. And so, we are moving forward. And the other thing is to take all these recommendations from UNICEF and PAHO, in terms of advertising to children and adolescents that go beyond, that is, apart from labelling, digital spaces, which is very important".* |
| MEX36 | Mexico | Next steps | Academia | *"And well, now it has just been passed in one of the instances this Law for healthy environments in schools. Well, I think that's also very closely linked to labelling, and what's going to happen with labelling. Because it will also involve the sale of food with labels inside schools and on the periphery of schools. So, it all has to be kind of like manoeuvres that add up".* |
| ARG16 | Argentina | Type of regulatory instrument | Civil society | *"It was quite complex to convince the decision makers of the need for the Standard to clearly state how the graphic system was going to be in terms of measurements and so on, and that the nutrient profiling system was going to be that of PAHO. Because, well, that is, they said that it was too regulatory, that it had to be subject to regulation and we knew that if that happened it would make things very difficult later on. In other words, there could be different changes or things could happen in the middle, let's say that it is important that everything is established in the Standard".* |
| ARG17 | Argentina | Type of regulatory instrument | Civil society | *"Well, I think it was very important that they went for the Legislative power, that what they seek is the representation of the people and not so much the interests of the Executive, which sometimes respond to who paid for the campaign. Well, people were hand-picked and so on".* |
| ARG18 | Argentina | Role of stakeholders | Government | *"We had a lot of contact with a congresswoman, especially that she was the one who took up the issue in the lower house. And we had many meetings to clarify this and we helped her a lot with the issue of substantiation. So, like those legislators who compromised, many were those who collaborated to prevent the industry from advancing a bit".* |
| ARG19 | Argentina | Role of stakeholders | Government | *"That's why I tell you that the greatest support for me comes from the point of view of mobilization, when we manage to get this issue taken up by these organizations and give it visibility. We also made mobilizations at the door of the Congress. The issue then became a little bit more installed in certain media".* |
| ARG20 | Argentina | Role of stakeholders | Civil society | *"And that at the time of the defense of the law by deputies, speeches were heard that referred to a full understanding of the subject, an incorporation of vocabulary, an understanding of the problematic that is difficult to see discussions within a chamber of decision-makers. So, that is where I believe that all the effort and work of civil society was printed in the fact that we made complex or technical things simple, in the vocabulary of the people".* |
| ARG21 | Argentina | Role of stakeholders | Civil society | *"And there was also something interesting and we see that we were working in the sense of how to work the messages and how to the different decision makers. Perhaps they were approached by, well, obviously everyone, the same policy brief, etc. But how the message was framed, how the messages were framed were different and there were, perhaps decision-makers who were more receptive to the idea of the right to information...".* |
| ARG22 | Argentina | Role of stakeholders | Civil society | *"It also allowed us to give it more visibility and then to create a bloc of organizations with a clear discourse, let's say, about what was the best policy and why it was important to promote it. So, both the decision-makers and the public opinion and we have listened to a speech that, although it had different nuances, it was very clear on certain points".* |
| ARG23 | Argentina | Role of stakeholders | Civil society | *"Through the support of international organizations, which I also believe was very important, such as PAHO, UNICEF, let's say both organizations and to a lesser extent FAO, but which also joined in, they played a very active role in promoting the policy and so we have the Ministry of Health with one discourse, civil society organizations with different profiles with the same discourse and the main international organizations with the same discourse".* |
| ARG24 | Argentina | Industry interference | International organization | *"Always the Ministry of Health, they had like the idea 'it's better to have everyone inside, sitting at the table and then have them tell you directly and listen directly to what they have to say before they go on the outside and do more damage'. So, they always tried to have majorities without conflict of interest, precisely to vote and win by majority, but it’s that they had conflicts of interest that will be exposed as voting against with their position".* |
| ARG25 | Argentina | Industry interference | Government | *"There were campaigns of disinformation or misrepresentation of what was actually being discussed and they also arrived in this way, in Power Point mode, to the e-mails of the deputies".* |
| ARG26 | Argentina | Industry interference | Government | *"For example, the Argentine Nutrition Society, which has very serious conflicts of interest, once held a conference where all the panellists were from the industry, all of them, from the first to the last. And we were invited to comply, of course, as a reactive panel that gives you two minutes to speak, after 45-minute presentations, 67 different people, you had two minutes to answer. Well, tough, tough".* |
| ARG27 | Argentina | Industry interference | Civil society | *"Well, as the clearest strategies, well, they were in the coalition with the media. We didn’t reach the mass media, people free of conflicts of interest, until after the Senate's half sanction. Until now, the discussion in the mass media was of a select niche and we only saw industry-paid referents, and this is obviously due to the fact that the media are sustained by the advertising and the advertising comes from the large pharmaceutical and food companies. (...) And clearly, we had a very big disadvantage, that is, the industry exposed professionals on television, permanently in central places. And they occupied chairs in television programs that a lot of people watch. And only a single voice was heard".* |
| ARG28 | Argentina | Industry interference | International organization | *"They used all the time the arguments of damage to MERCOSUR, which also happened in Brazil and Uruguay. That a national law was violating MERCOSUR regulations and was going to be a barrier to trade. And that, in fact, MERCOSUR had to establish those standards."* |
| ARG29 | Argentina | Industry interference | Civil society | *"But well, the Ministry of Industry, by its very nature, was like much closer to the claims of the industry and, in fact, also in the beginning was to talk to representatives of the industry that no longer, this is not discussed at the legislative level. This is discussed at the MERCOSUR level or at the CONAL [National Food Commission] level, it’s not the scope".* |
| ARG30 | Argentina | Industry interference | International organization | *"They made all voluntary agreements with the government to try to avoid regulation, direct lobbying, dirty campaigns in the sense of exposing or intimidating civil society actors, corporate social responsibility programs before the pandemic and during the pandemic to position themselves as part of the solution, threats of litigation, public defamation".* |
| ARG31 | Argentina | Industry interference | Government | *"The resistances (...) not only did not favour, but it’s also true that it has a very important determining power, not only for the public agenda, but also as regards other central economic policies and in the question of in every sense there’s a very open board in the discussions. Then, even, let's say, some actors who had been pushing, let's say, from the government, from the Executive, began to have less drive and less willingness to move forward so fast because they were conditioned, because they are the ones who have to sit down with those sectors to carry out other types of policies".* |
| ARG32 | Argentina | Industry interference | Civil society | *"And there was also a lack of transparency on the part of the State. We requested the information about the extensions [for the implementation] several times and we could never obtain it, because they say it’s private information, that it’s confidential, etc. But well, that’s also very confusing for the population because they had these labels and this one does not, but it’s not that one is healthier than the other, it’s that one has an extension and the other does not".* |
| ARG33 | Argentina | Industry interference | Government | *"Subsequent to the sanction, what they started doing is sending letters and administrative claims, which they do all the time to the Ministry. And they also made precautionary measures, they made claims or promoted claims from other countries, claims in the WTO from the United States and from Costa Rica. (...) And now, for example, the measure of the dairy industry that wanted us to exempt all their products because they are the backbone of family nutrition, according to them. They wanted this, they made the claim, they made an administrative claim from the Ministry, then they made a claim to the justice system, they were denied, they appealed, and now it was just denied again, and now they only have the Supreme Court of Justice left, which I don't think they will get there".* |
| ARG34 | Argentina | Response to industry interference | International organization | *"More recently, when the Law was already being discussed, the lobbying actions were very big with legislators, some legislators denounced that publicly. They denounced Coca Cola for trying to block the legislation in the Congress. It was a scandal and social organizations took advantage of it to disseminate it".* |
| ARG35 | Argentina | Collaboration and support | International organization | *"These meetings were funded by PAHO and UNICEF because the States didn't have the money, so PAHO and UNICEF did. It was like generating like the international movement parallel to the national movement".* |
| ARG36 | Argentina | Collaboration and support | Civil society | *"The support from the region was kind of key to anticipate the process, let's say, to know how they were going to do things in places where they had already passed [the FoPNL regulation]. (...) I believe that the result of Argentina's Law is a result for the region because it cannot be thought of in isolation from everything that happened in other countries. And all those networks that were created with other countries. So that also seems to me to have been a facilitating factor in understanding why the policy came about. Well, that (...) for me was key, that's why for me it's like a, it's a law of Latin America".* |
| ARG37 | Argentina | Collaboration and support | International organization | *"...the regional dynamics in Latin America, where the level of contagion effect and collaboration in the exchange of experiences between countries in the region is impressive and it’s incredible”.* |
| ARG38 | Argentina | Collaboration and support | International organization | *"Because social organizations began to participate for the first time in MERCOSUR meetings, when they did not have that participation, so I think that was also a very nice process, of civil society collaboration, which became part of the MERCOSUR agenda. MERCOSUR was in governments and industry, and civil society did not participate. Maybe a little more in Brazil. And besides, they weren't there, they didn't have it on their agenda and it started to happen from the collaboration with Brazil and Uruguay".* |
| ARG39 | Argentina | Human and children's rights | Government | *"...but yes, childhood, in the sense that there was a subject to protect, which was the infants, who were totally affected without having any say, let's say, in the type of food, as certain chronic non-communicable diseases that are related to the intake of this type of food, those with excess of critical nutrients, such as those we were trying to warn about, had increased".* |
| ARG40 | Argentina | Human and children's rights | Government | *"They need to eat well, especially in infancy, because that's what's going to promote healthy growth. And so, providing clear information allowed people to make assertive and informed choices and that this can help with dietary improvement, complemented of course with food education. (...) In fact, since last year, we have been conducting teacher training courses on nutrition in which we work together with the Ministry of Education and with pedagogues so that they can adapt the contents and differentiated activities are also provided, depending on the level of the teacher".* |
| ARG41 | Argentina | Human and children's rights | Civil society | *"It seems to me that that approach echoed, challenged many of the decision makers and decision makers who spoke and was part of the speeches to support the Law. And in the case of childhood, always the gateway, let's say, to talk about the problem".* |
| ARG42 | Argentina | Human and children's rights | International organization | *"The human rights narrative ran through the entire campaign. I would tell you that, for several years, it started from the beginning, but it grew stronger and with the inclusion of organizations. FIC always had a very strong human rights perspective with the legal team, but that was further strengthened when they joined organizations like Fundeps, which is an organization of lawyers that brought the human rights agenda with greater force and greater federalism".* |
| ARG43 | Argentina | Challenges, difficulties and threats | Civil society | *"So, of course, talking about front-of-package labelling even served the industry to say 'they're wanting to label while people aren't being able to eat,' as putting one right above the other. As if we should accept that eating anything or regardless of the impact of what we eat or the consequences it may attract. So, yes, those were complicated times, but I would say that the economic, social and political crises were the big ones, plus the interference of the industry and how others used those realities in their favour, were like the big focal points that had to be fought".* |
| ARG44 | Argentina | Challenges, difficulties and threats | Civil society | *"That was a big challenge. Thinking that the food policy agenda is one for the poor and one for the rich, when in reality there is a single agenda, which is access to safe and healthy food and a more holistic view of food systems."* |
| ARG45 | Argentina | Challenges, difficulties and threats | Government | *"Because sometimes there is not only a discussion about the content of the bill, but also about the convenience or not of carrying out or supporting a conquest that will be taken away by another political space, let's say, there were other kinds of discussions in the middle that had to be overcome (...). And I was telling you, it seems to me that it had to do with this, the interferences that took place at a time when at first, we had a more univocal will and it seemed that there was a certain degree of transversality among political spaces, because there were projects from the different benches".* |
| ARG46 | Argentina | Challenges, difficulties and threats | International organization | *"So, to bring the technical discussion to a political level that a journalist can understand, that any NGO can understand, that the legislator can understand requires capacity building that takes time and resources, and that is a fundamental challenge to really move forward".* |
| ARG47 | Argentina | Challenges, difficulties and threats | International organization | *"The big challenges were always to do with industry interference at all stages. That’s one of the great challenges that has always existed, because we have always taken one step forward and taken two steps back because the industry was in the way".* |
| ARG48 | Argentina | Strengths and lessons learned | International organization | *"And the legislators in the speech of approval of the Law thanked the social organizations. This was a rare recognition (...) So many legislators said ‘and thanks to the Federation of Nutritionists who visited us in each province, and thanks to FIC, and thanks to SANAR who puts, and thanks to those who denounced the campaigns and took care of us’. It was so touching".* |
| ARG49 | Argentina | Strengths and lessons learned | Government | *"That's very rich, very rich and generating own evidence about our population in that process. You have to give yourself the time to do it and then, of course, you have to get political support because you know that the industry is going to push at the highest levels, where technicians have no capacity to influence, and what does it matter what the technical position is, if there is no political authority behind it that is determined to sustain the process?”.* |
| ARG50 | Argentina | Strengths and lessons learned | Civil society | *"The mass media campaign that was carried out before the sanction of the Law, which was very large, I think it was like the end of this whole process that had been going on for a long time, and that allowed, as a certain massiveness and (...) that a large part of the population knows what labelling is and talks about labelling and that this pressure reaches the deputies who had to vote".* |
| ARG51 | Argentina | Strengths and lessons learned | International organization | *"So, if each of the intervening actors has a different role, some more of denunciation, others more of execution, others more of evidence generation, it seems to me that it’s the only way to be able to reach a good port, which is what happened in Argentina, look for the moment, look for the right actors and trust in civil society, otherwise it’s very complex".* |
| ARG52 | Argentina | Strengths and lessons learned | Civil society | *"I felt like I was kind of inside a group of superheroes. As if each organization had its superpower and could do in some way, give scientific support or media support or by putting the body in the street or by summoning thousands and thousands of professionals throughout Argentina. Like, everyone had their own very big potential".* |
| ARG53 | Argentina | Next steps | International organization | *"Industry is hampering implementation in all countries with all its heavy artillery and governments have very little capacity to oversee, implement, monitor, evaluate. We know that our governments have little capacity in that sense, so strengthening those capacities in governments is fundamental, taking legal action against the industry that violates the laws is fundamental, we have to start suing companies that are violating labelling laws".* |
| ARG54 | Argentina | Next steps | Government | *"But, really, it seems to me that the steps to follow now have to do precisely with continuing to explain, also because there are still doubts linked to the implementation, obviously that these labels appear, ‘what does it mean, what is happening?’. So, we have to continue doing this work facing society, on the one hand, and also so that society can act as a comptroller and demand compliance with this. (...) It means continuing to work not only from the point of view of regulation and compliance control, but also from a cultural point of view. Let's say, an educational and cultural issue to be able to assimilate as their own this new norm, this regulation".* |
